# Supplementary material for: Changes in Dietary Patterns through a Nutritional Intervention with a Traditional Atlantic Diet: The Galiat Randomized Controlled Trial
Source: MDPI journal article supplement (doi:10.3390/nu13124233), 2021-11-25
Supplement: s1 [file s1]

**Supplementary Table S3.** Relation between baseline to 6-month mean changes in body weight ( $\beta$  coefficients) and baseline to 6-month mean changes in the dietary pattern scores using the entire sample independent of group allocation (per-protocol data set).

| Change in food pattern score <sup>1</sup> | Coefficient (95% CI)   | P     |
|-------------------------------------------|------------------------|-------|
| Caloric                                   | 0.172 (0.002, 0.343)   | 0.047 |
| Frieds                                    | 0.250 (0.065, 0.434)   | 0.008 |
| Fruits, vegetables, and dairy products    | -0.186 (-0.375, 0.002) | 0.053 |
| Alcohol                                   | 0.025 (-0.177, 0.226)  | 0.881 |
| Fish and boiled meals                     | -0.074 (-0.236, 0.089) | 0.374 |

<sup>1</sup> Food pattern exposure variables are measured as change in factor score between baseline to 6-months. All food patterns are tested together in the same model. 95% CI, 95% confidence interval.
