# Supplementary material for: Changes in Dietary Patterns through a Nutritional Intervention with a Traditional Atlantic Diet: The Galiat Randomized Controlled Trial
Source: MDPI journal article supplement (doi:10.3390/nu13124233), 2021-11-25
Supplement: s1 [file s1]

**Supplementary Table S1.** Food groupings used in the dietary pattern analysis.

| <b>Food groups</b>             | <b>Foods items</b>                                                                                                                                                      |
|--------------------------------|-------------------------------------------------------------------------------------------------------------------------------------------------------------------------|
| Low-fat dairy products         | Skimmed and semi-skimmed milk, yogurt or kefir, with added sugar or not; skimmed and semi-skimmed cheese                                                                |
| Whole fat dairy products       | Whole milk, whole yogurt or kefir; fatty cheese; butter; fermented milk beverages; sugary milk derivatives such as milk cream, milk shakes                              |
| Fried or scrambled eggs        | Fried or scrambled eggs                                                                                                                                                 |
| Boiled or poached eggs         | Boiled or poached eggs                                                                                                                                                  |
| Cooked, steamed, roasted meats | Chops, steak, bovine, pork, poultry, etc.                                                                                                                               |
| Fried meats                    | Chops, steak, bovine, pork, poultry, etc.                                                                                                                               |
| Processed meats                | Hamburgers, sliced and preserved ready-to-cook products: sausages, ham, loin                                                                                            |
| Boiled fishes and seafood      | Boiled fishes and seafood                                                                                                                                               |
| Fried fishes                   | Fried fish and fish fingers                                                                                                                                             |
| Vegetables                     | Raw vegetables, usually mixed in a salad (e.g., cucumber, lettuce, tomato); cooked vegetables (e.g., cabbage, broccoli, green bean)                                     |
| Boiled potatoes                | Boiled potatoes                                                                                                                                                         |
| Fried potatoes                 | Fried potatoes, chips                                                                                                                                                   |
| Fruits                         | Fresh fruit (also freshly made fruit smoothies)                                                                                                                         |
| Legumes                        | Legumes (lentils, chickpeas, beans)                                                                                                                                     |
| Sweets                         | Snacks like biscuits, packaged cakes, pastries, puddings, cereal bars, candies, loose candies, marshmallows, ice cream, milk or fruit-based bars, chocolate, candy bars |
| Honey                          | Honey                                                                                                                                                                   |
| Whole grains                   | Whole grain bread, dark roll, dark crispbread, whole meal pasta, brown rice                                                                                             |
| Refined grains                 | White bread, white roll, white crispbread, breakfast cereals, pasta, noodles, white rice                                                                                |
| Pizza                          | Pizza                                                                                                                                                                   |
| Nuts                           | Nuts, seeds, dried fruit                                                                                                                                                |
| Salty snacks                   | Snacks like chips, popcorn.                                                                                                                                             |
| Margarine                      | Margarine                                                                                                                                                               |
| Olive oil                      | Olive oil                                                                                                                                                               |
| Sunflower oil                  | Sunflower oil                                                                                                                                                           |
| Mayonnaise and ketchup         | Mayonnaise and mayonnaise-based products; ketchup                                                                                                                       |
| High-energy drinks             | Sweetened drinks including sports drinks, bottled tea, syrup-based drinks                                                                                               |
| Low-energy drinks              | Diet coke or diet sodas, flavored water included (no added sugar)                                                                                                       |
| Coffee                         | Coffee                                                                                                                                                                  |
| Tea, herbal tea                | Tea, herbal tea                                                                                                                                                         |
| Wine                           | Red wine, white wine                                                                                                                                                    |
| Beer                           | Beer                                                                                                                                                                    |
| Liquors                        | Liquors                                                                                                                                                                 |
| Precooked food                 | Precooked food                                                                                                                                                          |
| Tofu                           | Tofu                                                                                                                                                                    |
