# Supplementary material for: Changes in Dietary Patterns through a Nutritional Intervention with a Traditional Atlantic Diet: The Galiat Randomized Controlled Trial
Source: MDPI journal article supplement (doi:10.3390/nu13124233), 2021-11-25
Supplement: s1 [file s1]

**Supplementary Table S2.** Dietary patterns scores (with their 95% confidence intervals) identified by principal component analysis for intervention and control groups at baseline and after 6-months (per-protocol data set).

|                                        | Intervention group        |                            | Control group             |                            | Adjusted mean differences  | P-value | ICC   |
|----------------------------------------|---------------------------|----------------------------|---------------------------|----------------------------|----------------------------|---------|-------|
|                                        | Baseline                  | 6 months                   | Baseline                  | 6 months                   |                            |         |       |
| Caloric                                | -0.131<br>(-0.307, 0.044) | -0.587<br>(-0.729, -0.446) | 0.034<br>(-0.168, 0.237)  | -0.019<br>(-0.187, 0.149)  | -0.443<br>(-0.657, -0.229) | <0.001  | 0.238 |
| Frieds                                 | -0.141<br>(-0.330, 0.047) | -0.632<br>(-0.785, -0.480) | 0.125<br>(-0.054, 0.304)  | -0.111<br>(-0.282, 0.060)  | -0.374<br>(-0.603, -0.144) | 0.001   | 0.328 |
| Fruits, vegetables, and dairy products | 0.165<br>(-0.008, 0.337)  | 0.468<br>(0.279, 0.656)    | -0.132<br>(-0.294, 0.029) | -0.283<br>(-0.460, -0.105) | 0.565<br>(0.319, 0.813)    | <0.001  | 0.268 |
| Alcohol                                | 0.006<br>(-0.149, 0.160)  | -0.275<br>(-0.385, -0.165) | -0.002<br>(-0.164, 0.159) | -0.211<br>(-0.356, -0.065) | -0.086<br>(-0.245, 0.073)  | 0.289   | 0.092 |
| Fish and boiled meals                  | -0.021<br>(-0.174, 0.133) | 0.276<br>(0.118, 0.433)    | 0.043<br>(-0.120, 0.206)  | -0.178<br>(-0.331, -0.024) | 0.481<br>(0.212, 0.749)    | <0.001  | 0.426 |
